# Supplementary material for: Surgical education – online or on-site? A single-center survey of German medical students
Source: Research Square preprint supplement (doi:10.21203/rs.3.rs-6557289/v1), 2025-06-18
Supplement: Supplementary file 1 [file 877af535e40564caa91e8c00.pdf]

Translation of the questionnaire used for the manuscript the title: “Surgical education – online or on-site? A single-center survey of German medical students”, original questionnaire in German and available upon request from the corresponding author.

1. I regularly visited on-site lectures before the COVID-19 pandemic.

|       |   |   |   |   |   |   |   |       |
|-------|---|---|---|---|---|---|---|-------|
|       | 1 | 2 | 3 | 4 | 5 | 6 | 7 |       |
| never | 0 | 0 | 0 | 0 | 0 | 0 | 0 | daily |

2. During the COVID-19 pandemic I missed interacting with my peers.

|       |   |   |   |   |   |   |   |                |
|-------|---|---|---|---|---|---|---|----------------|
|       | 1 | 2 | 3 | 4 | 5 | 6 | 7 |                |
| never | 0 | 0 | 0 | 0 | 0 | 0 | 0 | strongly agree |

3. During the COVID-19 pandemic I missed interacting with teachers.

|       |   |   |   |   |   |   |   |                |
|-------|---|---|---|---|---|---|---|----------------|
|       | 1 | 2 | 3 | 4 | 5 | 6 | 7 |                |
| never | 0 | 0 | 0 | 0 | 0 | 0 | 0 | strongly agree |

4. During the COVID-19 pandemic I missed interacting with patients.

|       |   |   |   |   |   |   |   |                |
|-------|---|---|---|---|---|---|---|----------------|
|       | 1 | 2 | 3 | 4 | 5 | 6 | 7 |                |
| never | 0 | 0 | 0 | 0 | 0 | 0 | 0 | strongly agree |

5. I would prefer for my medical studies

|                      |   |   |               |   |   |   |   |                         |
|----------------------|---|---|---------------|---|---|---|---|-------------------------|
|                      | 1 | 2 | 3             | 4 | 5 | 6 | 7 |                         |
| Only online teaching | 0 | 0 | 0             | 0 | 0 | 0 | 0 | online on-site teaching |
|                      |   |   | A mix of both |   |   |   |   |                         |

6. For practical courses I prefer

|                      |   |   |               |   |   |   |   |                         |
|----------------------|---|---|---------------|---|---|---|---|-------------------------|
|                      | 1 | 2 | 3             | 4 | 5 | 6 | 7 |                         |
| Only online teaching | 0 | 0 | 0             | 0 | 0 | 0 | 0 | online on-site teaching |
|                      |   |   | A mix of both |   |   |   |   |                         |

7. For seminars I prefer

|                      |   |   |               |   |   |   |   |                         |
|----------------------|---|---|---------------|---|---|---|---|-------------------------|
|                      | 1 | 2 | 3             | 4 | 5 | 6 | 7 |                         |
| Only online teaching | 0 | 0 | 0             | 0 | 0 | 0 | 0 | online on-site teaching |
|                      |   |   | A mix of both |   |   |   |   |                         |

8. For lectures I prefer

|                      | 1                     | 2                     | 3                     | 4                     | 5                     | 6                     | 7                     |                         |
|----------------------|-----------------------|-----------------------|-----------------------|-----------------------|-----------------------|-----------------------|-----------------------|-------------------------|
| Only online teaching | <input type="radio"/> | online on-site teaching |
|                      |                       |                       | A mix of both         |                       |                       |                       |                       |                         |

9. I use e-learnings for preparation for and re-working of courses as well as for preparation for exams.

|                   | 1                     | 2                     | 3                     | 4                     | 5                     | 6                     | 7                     |                |
|-------------------|-----------------------|-----------------------|-----------------------|-----------------------|-----------------------|-----------------------|-----------------------|----------------|
| Strongly disagree | <input type="radio"/> | strongly agree |

10. I watch the provided asynchronous online lectures regularly.

|                   | 1                     | 2                     | 3                     | 4                     | 5                     | 6                     | 7                     |                |
|-------------------|-----------------------|-----------------------|-----------------------|-----------------------|-----------------------|-----------------------|-----------------------|----------------|
| Strongly disagree | <input type="radio"/> | strongly agree |

11. I watch some of the provided online material more than once.

|                   | 1                     | 2                     | 3                     | 4                     | 5                     | 6                     | 7                     |                |
|-------------------|-----------------------|-----------------------|-----------------------|-----------------------|-----------------------|-----------------------|-----------------------|----------------|
| Strongly disagree | <input type="radio"/> | strongly agree |

12. For what reasons do you prefer teaching online?

*Free text.*

13. For what reasons do you prefer teaching on-site?

*Free text.*

14. In which semester are you currently?

*Numbers, in completed semesters.*

15. How old are you?

*Numbers, in completed years.*

16. Gender: How do you identify?

*Male / female / divers*
